# Supplementary material for: Modifying the reactivity of a solid Lewis acid: niobium and antimony doped nanoscopic aluminum fluoride
Source: Royal Society of Chemistry journal article supplement (doi:10.1039/c8cy00502h), 2018-01-01
Supplement: c8cy00502h1.pdf [file c8cy00502h1.pdf]

## Supporting Information

# Modifying the Reactivity of a Solid Lewis Acid: Niobium and Antimony Doped Nanoscopic Aluminum Fluoride

C. Marshall,<sup>a,b</sup> T. Braun\*<sup>a</sup> and E. Kemnitz\*<sup>a</sup>

<sup>a</sup> Department of Chemistry, Humboldt-Universität zu Berlin, Brook-Taylor-Str. 2, 12489 Berlin, Germany

<sup>b</sup> School of Analytical Sciences Adlershof (SALSA), Humboldt-Universität zu Berlin, Unter den Linden 6, 10099 Berlin, Germany

### BET Surface Area

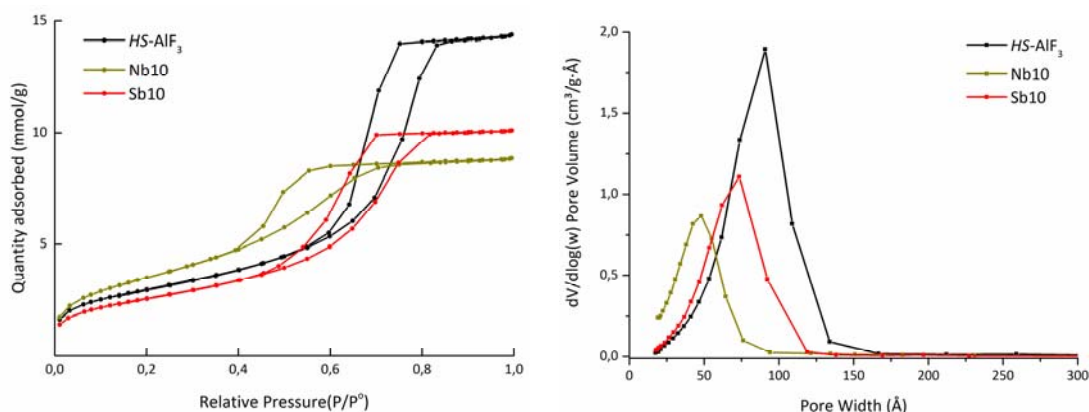

Figure S1: Nitrogen Adsorption Isotherms at 77K for Nb10, Sb10 and the undoped *HS-AlF<sub>3</sub>* (left) and pore size distribution (right)

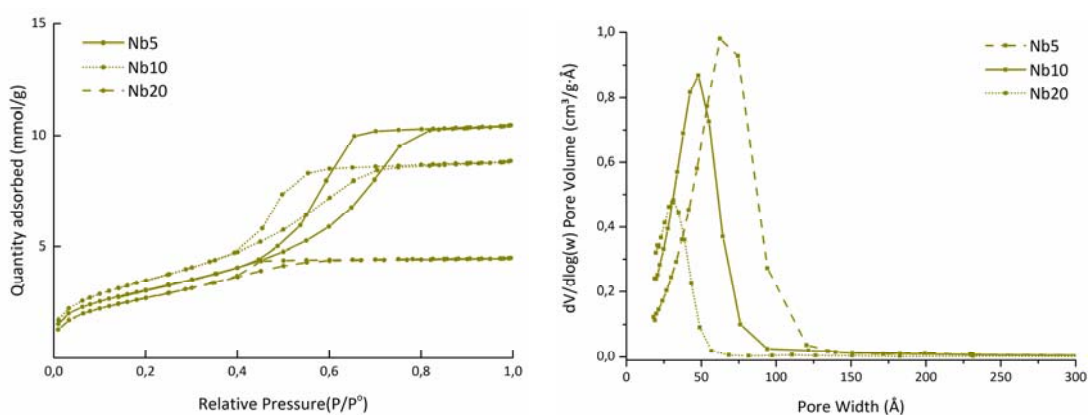

Figure S2: Nitrogen Adsorption Isotherms at 77K for the Niobium-doped series(left) and pore size distribution (right)

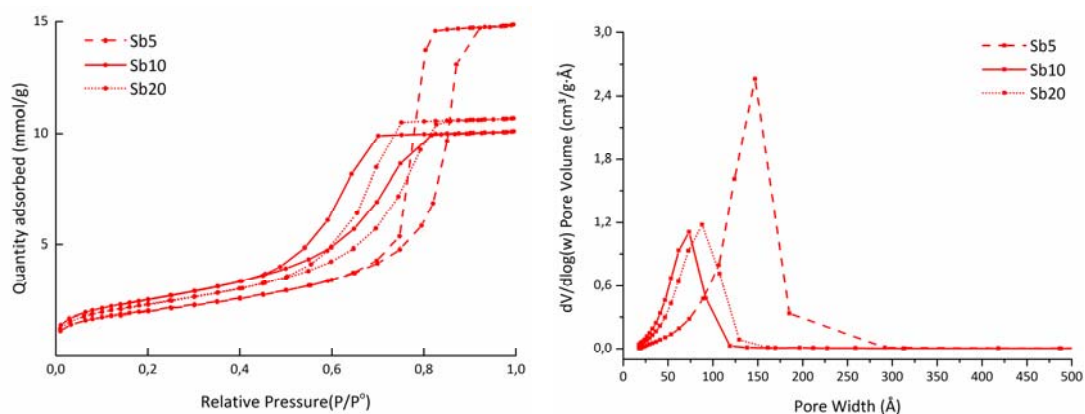

Figure S3: Nitrogen Adsorption Isotherms at 77K for the Antimony-doped series (left) and pore size distribution (right)

## Elemental Analysis

**Table S1** Elemental Analysis for selected catalysts

| Entry | Catalyst                              | %N     | %C     | %H    |
|-------|---------------------------------------|--------|--------|-------|
| 1     | <i>HS</i> -AlF <sub>3</sub>           | 0,005  | 1,648  | 1,683 |
| 2     | Precursor <i>HS</i> -AlF <sub>3</sub> | -0,007 | 18,271 | 3,750 |
| 3     | Nb10                                  | -0,001 | 1,494  | 0,352 |
| 4     | Precursor Nb10                        | -0,052 | 24,765 | 5,242 |
| 5     | Sb10                                  | 0,293  | 2,373  | 1,363 |
| 6     | Precursor Sb10                        | 0,337  | 4,309  | 3,009 |

## MAS NMR Spectra

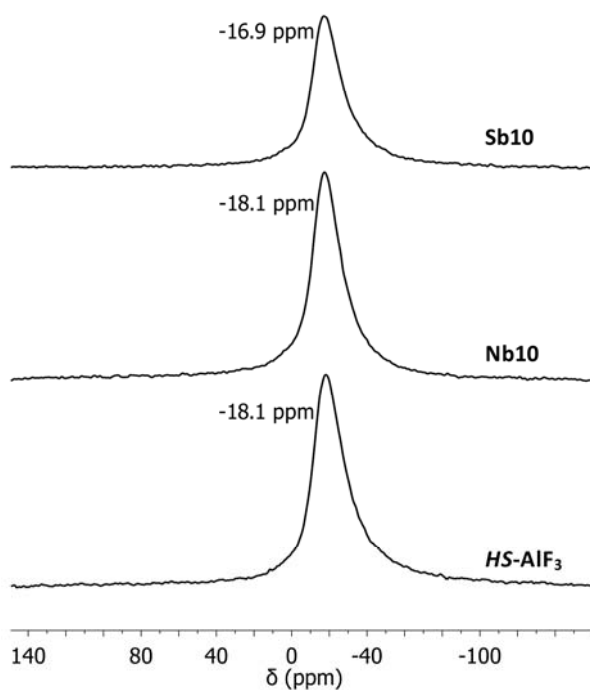

Figure S4: <sup>27</sup>Al MAS NMR spectra for Nb10 (20kHz, ns=800), Sb10 and *HS*-AlF<sub>3</sub> (25kHz, ns=800)

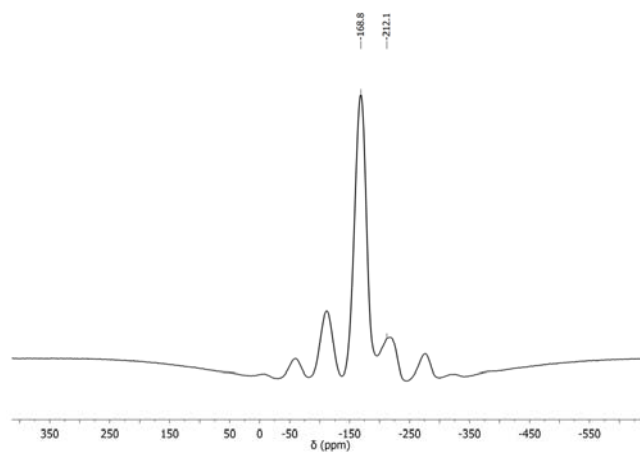

Figure S5:  $^{19}\text{F}$  MAS NMR spectra for Nb5 (20kHz, ns=64, D1=5s). Spinning side bands are depicted in asterisks

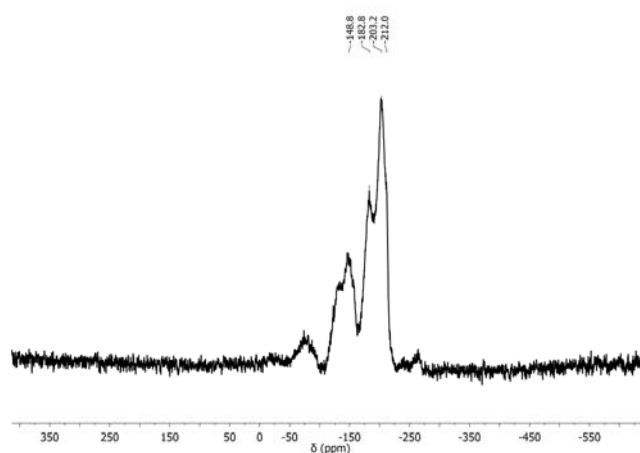

Figure S6:  $^{19}\text{F}$  Echo MAS NMR spectra for Nb5 (20kHz, ns=1280, L0=10)

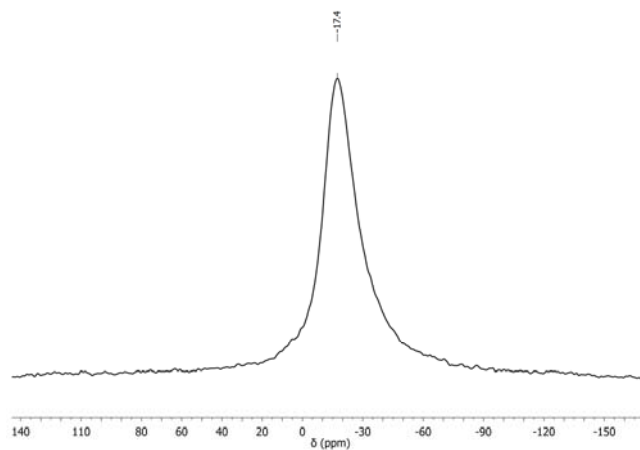

Figure S7:  $^{27}\text{Al}$  MAS NMR spectra for Nb5 (20kHz, ns=800)

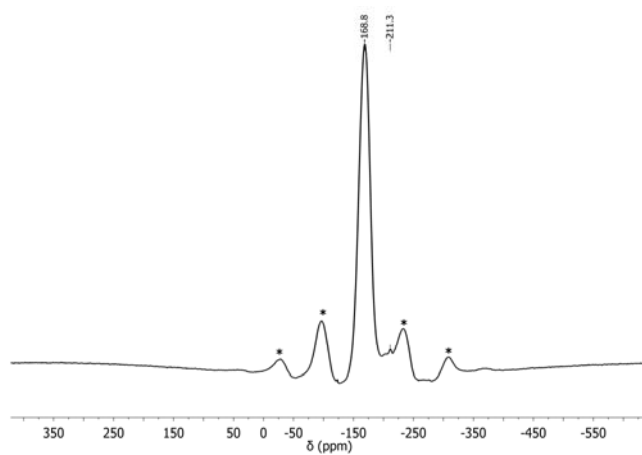

Figure S8:  $^{19}\text{F}$  MAS NMR spectra for Sb5 (25kHz, ns=64, D1=5s). Spinning side bands are depicted in asterisks

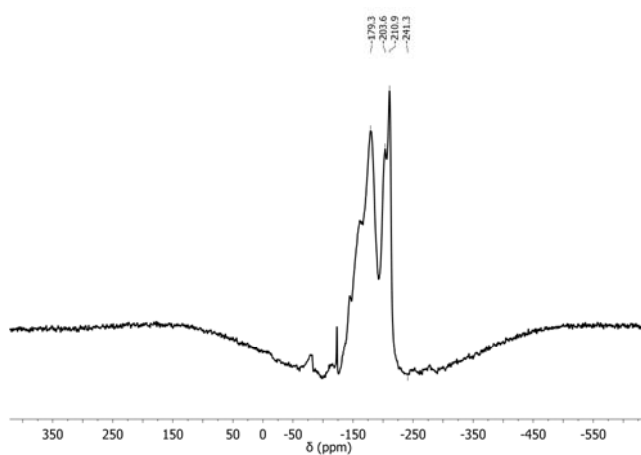

Figure S9:  $^{19}\text{F}$  Echo MAS NMR spectra for Sb5 (25kHz, ns=1024, L0=10)

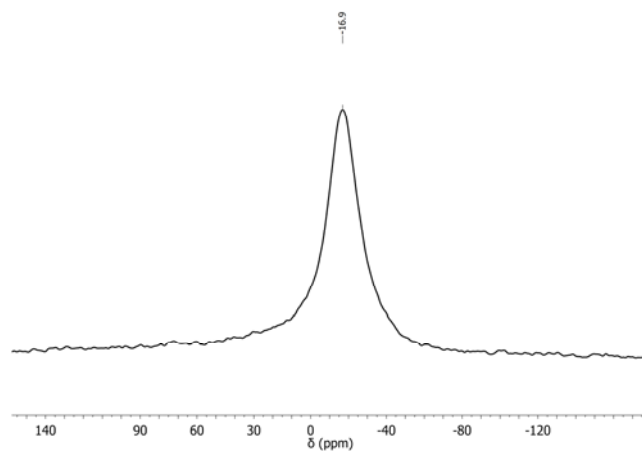

Figure S10:  $^{27}\text{Al}$  MAS NMR spectra for Sb5 (20kHz, ns=512)

## NH<sub>3</sub> TPD Profiles

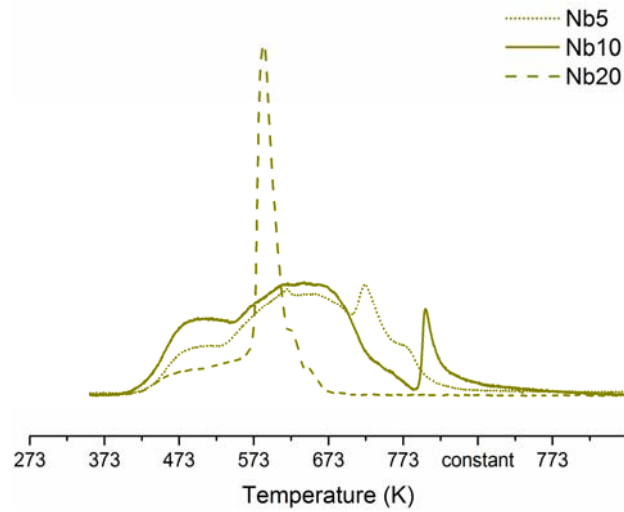

Figure S11: Ammonia TPD Profile for Nb-doped series

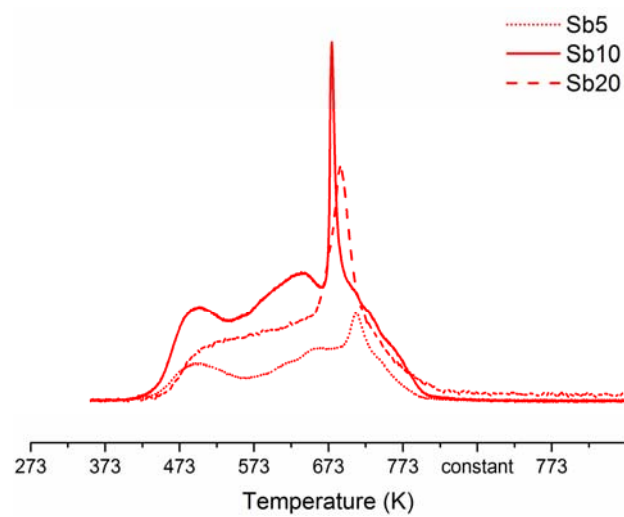

Figure S12: Ammonia TPD Profile for Sb-doped series

### PA-FTIR Spectra of absorbed pyridine (Py-PAS)

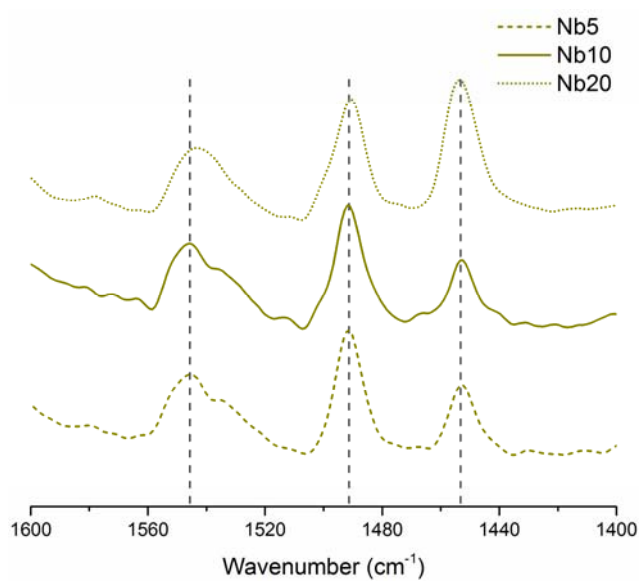

Figure S13: PAS-FTIR of absorbed pyridine on Nb-doped series

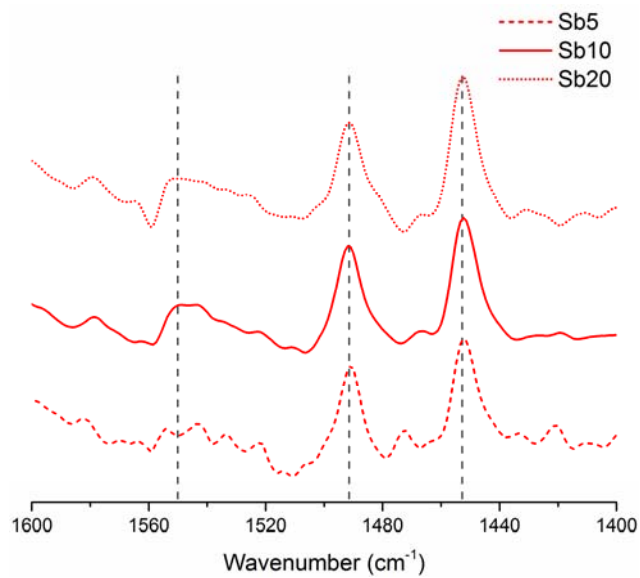

Figure S14: PAS-FTIR of absorbed pyridine on Sb-doped series

## Thermal Analysis (TG and DTA)

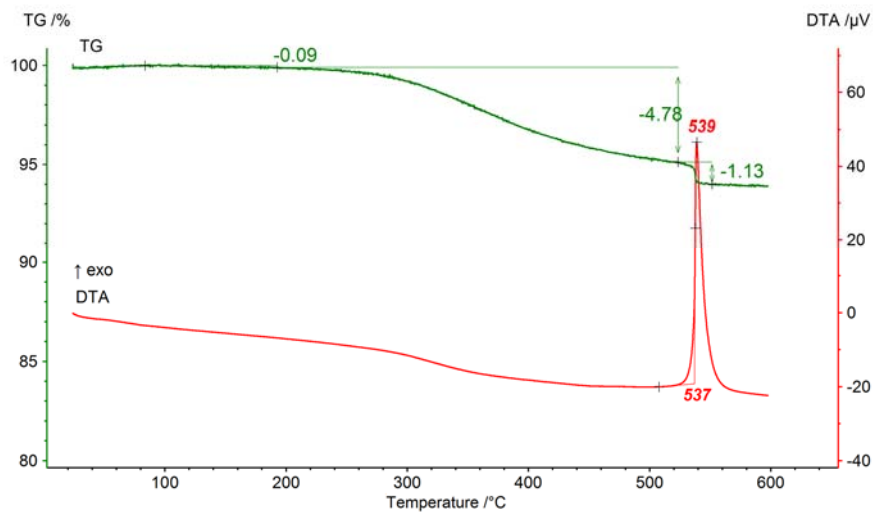

Figure S15. Thermogravimetry (green) and Differential Thermal Analysis (red) of Sb10

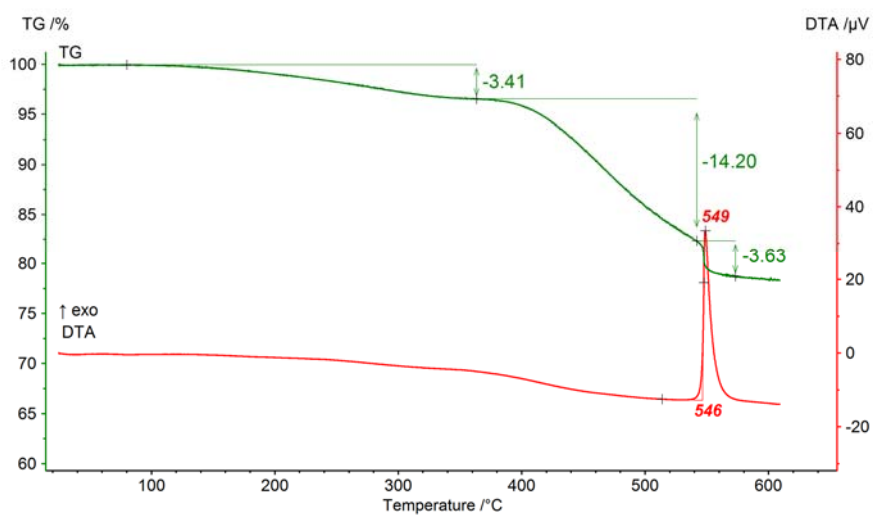

Figure S16. Thermogravimetry (green) and Differential Thermal Analysis (red) of Nb20
